# Supplementary material
Source: MDPI journal article supplement (https://www.mdpi.com/2624-5175/3/3/25)
Supplement: s1 [file s1]

**Supplementary Materials:** The following are available online at [www.mdpi.com/xxx/s1](http://www.mdpi.com/xxx/s1),

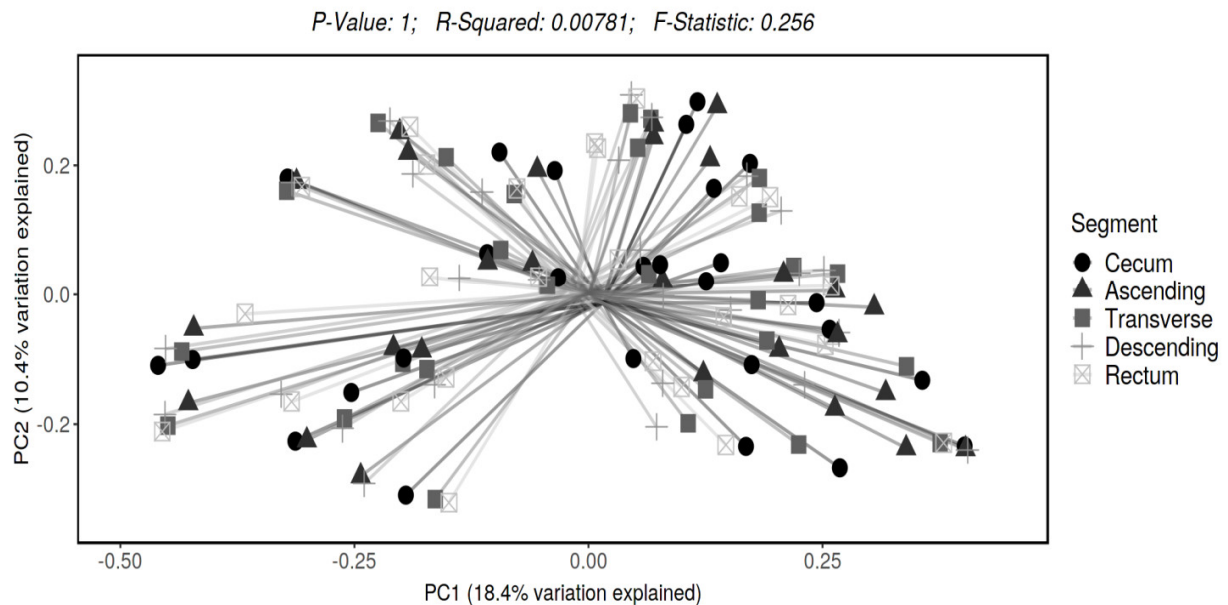

Supplemental Figure 1. The community composition of colonic mucosa-associated microbiota did not differ by colon segments.

Supplemental Table 1. Relative abundance (%) of the bacterial genera in short sleepers and normal sleepers in the OTU-based analysis

| Genus (phylum-family)                                  | Short sleepers | Normal sleepers | <i>q</i> values |
|--------------------------------------------------------|----------------|-----------------|-----------------|
| Lower in short sleepers                                |                |                 |                 |
| Relative abundance (%)                                 |                |                 |                 |
| Alistipes(Bacteroidetes-Rikenellaceae)                 | 0.57           | 1.54            | 0.019           |
| Lachnoclostridium (Firmicutes-Lachnospiraceae)         | 1.06           | 2.01            | 0.005           |
| Sutterella (Proteobacteria-Sutterellaceae)             | 0.38           | 1.25            | 0.00056         |
| Bilophila (Proteobacteria-Desulfovibrionaceae)         | 0.27           | 0.63            | 0.0026          |
| Paraprevotella (Bacteroidetes-Prevotellaceae)          | 0.06           | 0.28            | 0.017           |
| Phascolarctobacterium(Firmicutes-Acidaminococcaceae)   | 0.23           | 0.52            | 0.026           |
| Dorea (Firmicutes-Lachnospiraceae)                     | 0.02           | 0.17            | <0.0001         |
| Higher in short sleepers                               |                |                 |                 |
| Prevotellaceae(Unc00yx7)(Bacteroidetes-Prevotellaceae) | 1.60           | 0.12            | < 0.0001        |
| Lachnospiraceae(Unc08782) (Firmicutes)                 | 1.18           | 0.86            | 0.017           |
| Lachnospiraceae (Unc89581) (Firmicutes)                | 0.50           | 0.19            | 0.0024          |
| Lachnospiraceae (Unc01nqn) (Firmicutes)                | 0.40           | 0.11            | 0.005           |
| Lachnospiraceae (Unc04i72) (Firmicutes)                | 0.10           | 0.04            | 0.0053          |
| Fusicatenibacter (Firmicutes) (Firmicutes)             | 0.39           | 0.26            | 0.0068          |
| Ruminococcaceae (Unc058de) (Firmicutes)                | 0.19           | 0.05            | 0.0068          |
| Pseudomonas (Proteobacteria-Pseudomonadaceae)          | 0.14           | 0.08            | 0.0072          |
| Lachnospiraceae (Unc02p9p) (Firmicutes)                | 0.13           | 0.06            | 0.018           |
